# Supplementary material
Source: Elsevier journal article supplement (https://www.sciencedirect.com/science/article/pii/S0210570521000868)
Supplement: mmc2 [file S0210570521000868:mmc2.doc]

**Supplementary Table 1.** Chronic liver failure- sequential organ failure assessment (CLIF-SOFA) score (30)

| **CLIF-SOFA score** | **0** | **1** | **2** | **3** | **4** |
| --- | --- | --- | --- | --- | --- |
| **Respiration** | | | | | |
| PaO2/FiO2  or SpO2/FiO2 | >400  >512 | >300 to ≤400  >357 to ≤512 | >200 to ≤300  >214 to ≤357 | >100 to ≤200  89 to ≤214 | ≤100  ≤89 |
| INR | <1.1 | ≥1.1 to <1.25 | ≥1.25 to <1.5 | ≥1.5 to <2.5 | ≥2.5 or  platelet ≤20 |
| **Liver** | | | | | |
| Bilirubin, mg/dL  (lmol/L) | <1.2 (<20) | ≥1.2 to <2.0  (20–32) | ≥2.0 to <6.0  (33–101) | ≥6.0 to <12.0  (102–204) | ≥12.0 (>204) |
| **Cardiovascular** | | | | | |
| Hypotension | MAP ≥70 mmHg | MAP <70 mmHg | Dopamine ≤5 or  dobutamine  (any dose)* or  terlipressin | Dopamine >5 or  epi ≤0.1 or  norepi ≤0.1* | Dopamine >15 or  epi >0.1 or  norepi >0.1* |
| **CNS** | | | | | |
| HE grade | No HE | I | II | III | IV |
| **Renal** | | | | | |
| Creatinine  (mg/dL) | <1.2 | ≥1.2 to <2.0 | ≥2.0 to <3.5 | ≥3.5 to <5.0 or  use of RRT | ≥5.0 |

CNS = central nervous system; epi = epinephrine; FiO2 = fractional inspired oxygen; HE = hepatic encephalopathy; INR = international normalized ratio; MAP = mean arterial pressure; norepi = norepinephrine, PaO2 = arterial oxygen tension; RRT = renal replacement therapy; SpO2 = pulse oximetric saturation. **Gray shading in the table cells defines insufficiency of that organ.**

* Adrenergic agents administered for at least 1 h (doses are given in mcg/Kg/min).

**Supplementary Figure 1.** Kaplan-Meier curves for 30-, 90- and 365-day survival for each acute-on-chronic liver failure grade (ACLF).

~~
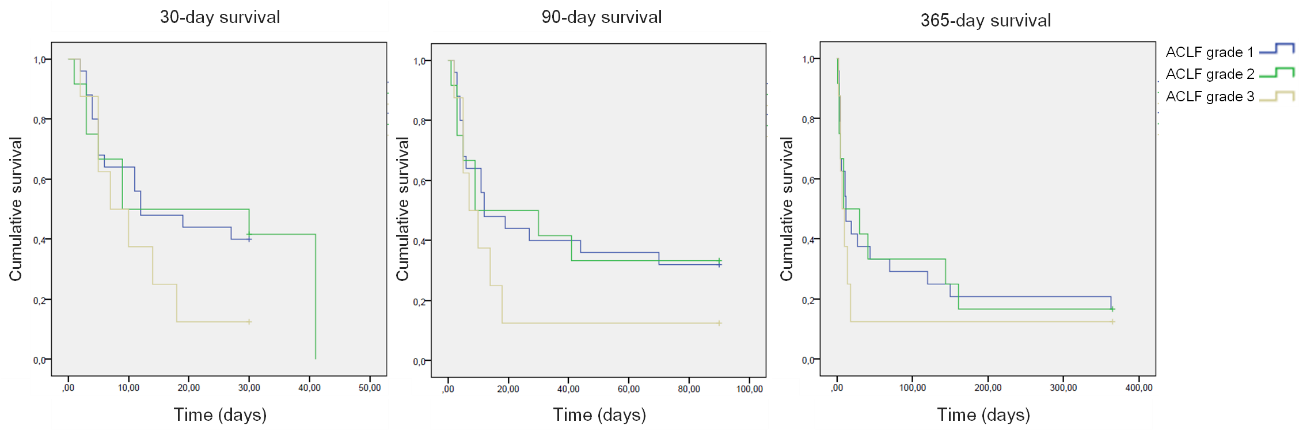
~~
